# Supplementary material for: A PSMA-Targeting CD3 Bispecific Antibody Induces Antitumor Responses that Are Enhanced by 4-1BB Costimulation
Source: Oxford University Press journal article supplement (doi:10.1158/2326-6066.cir-19-0518), 2020-03-17
Supplement: 23266066cir190518-sup-225319_2_supp_6053982_q6zpcp.docx [file 23266066cir190518-sup-225319_2_supp_6053982_q6zpcp.docx]

**SUPPLEMENTAL FIGURE LEGENDS**


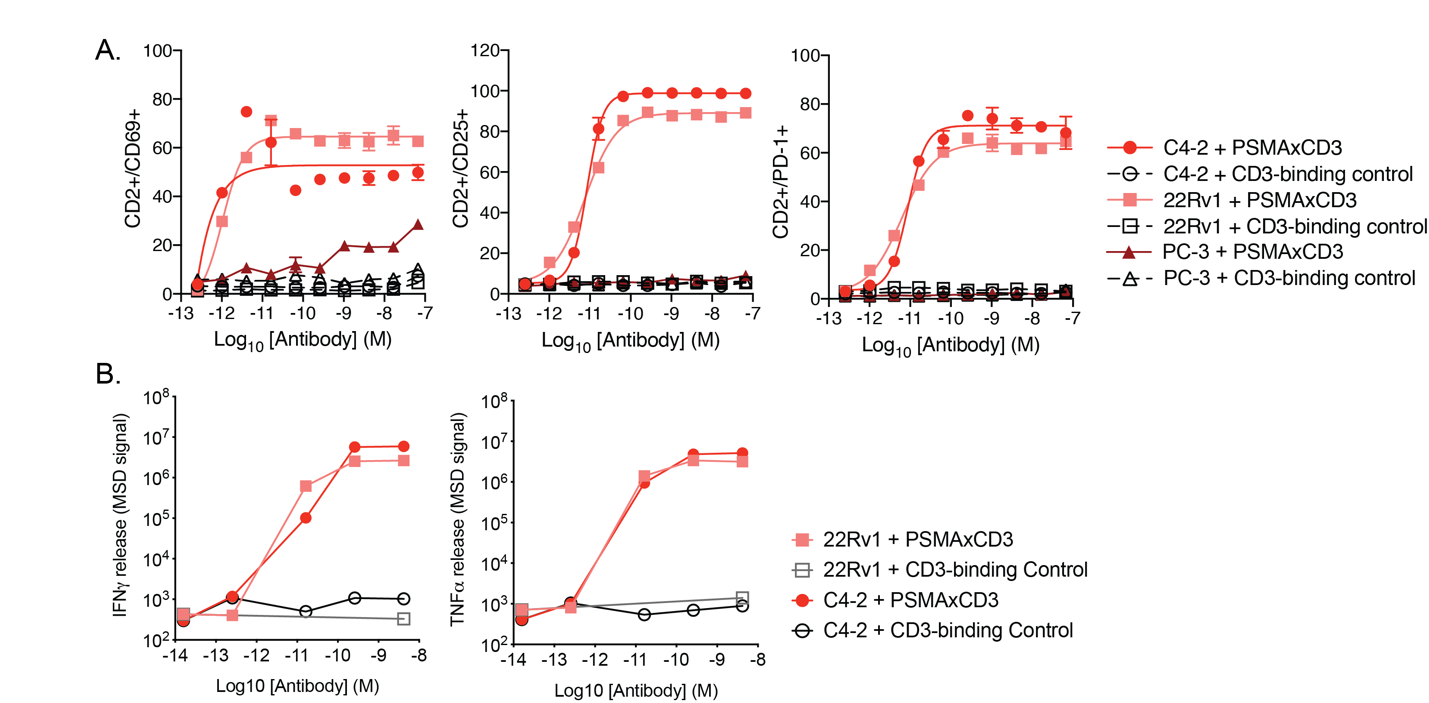


**Fig S1. PSMAxCD3 activates T cells and induces cytokine release in vitro.** (**A)** Tumor cells22Rv1, C4-2 or PC-3 were incubated with various concentrations of PSMAxCD3 or CD3-binding control in the presence of human PBMCs. CD69, CD25 and PD-1 surface expression on CD2+ T cells were examined by flow cytometry. (**B**)IFN and TNF cytokine release with the 22RV1 and C4-2 cell lines was examined by MSD. Mean values are shown as SEM (Duplicate wells, 3 replicates).


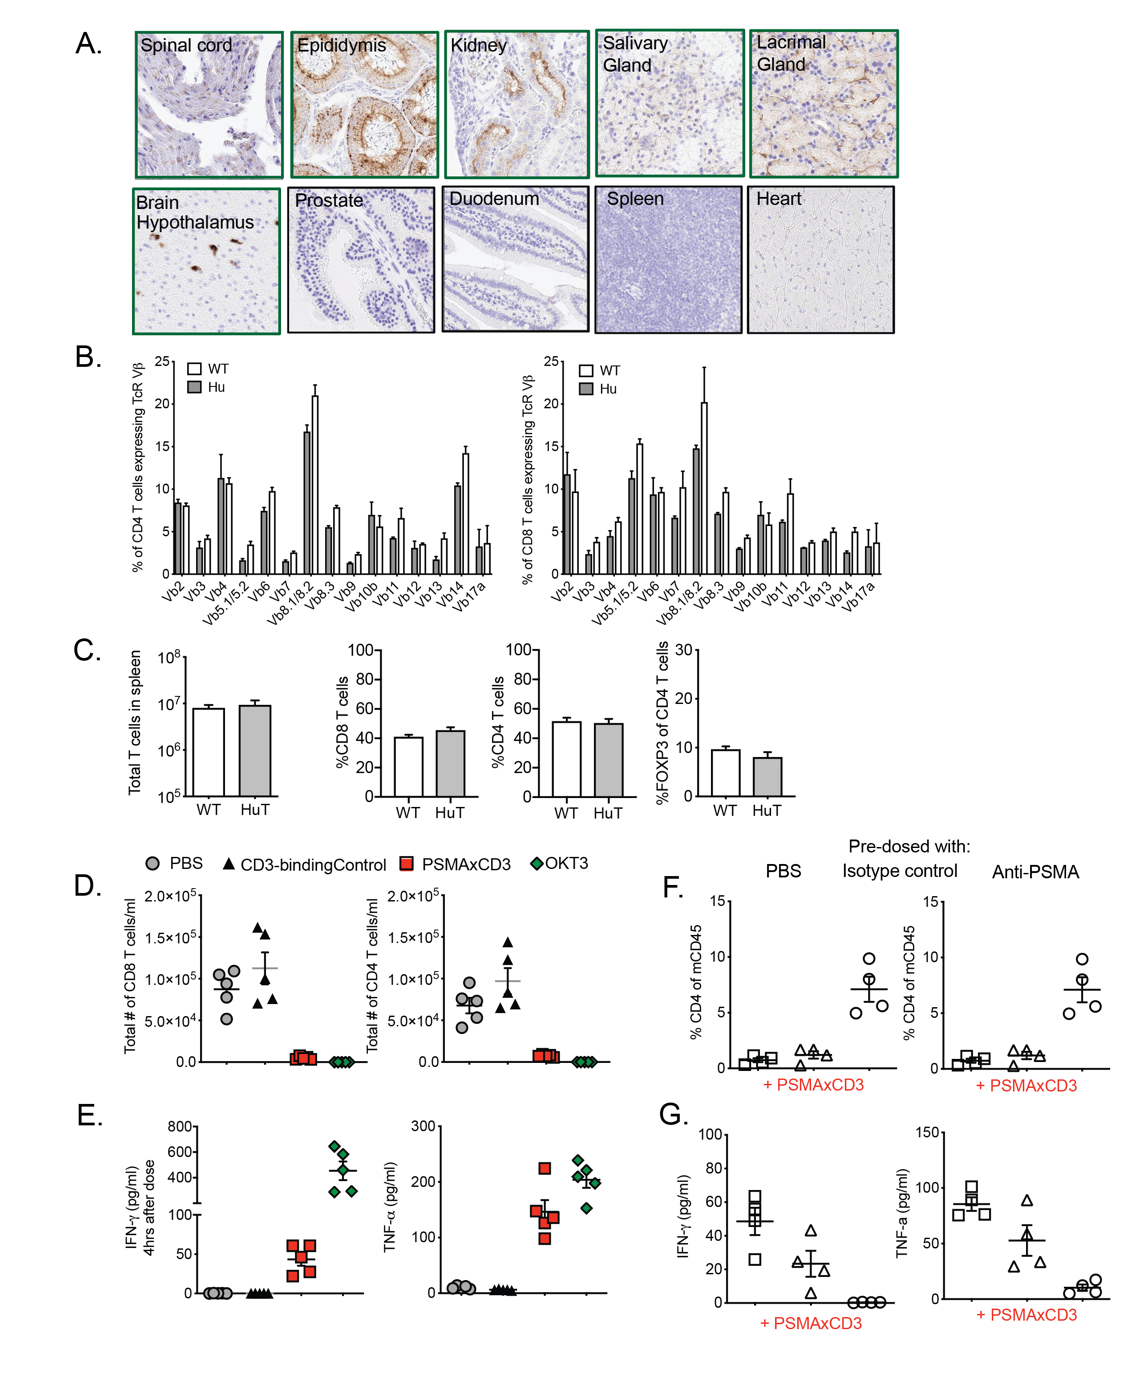


**Fig S2. Characterization of HuT mice.** (**A**) Immunohistochemistrystaining of PSMA expression in tissues from HuT mice. Green boxes indicate positively stained tissues. (**B**) Flow cytometry analysis of TCR v repertoire in CD4 (left) and CD8 (right) T cells from the spleens of WT and HuT mice. (**C**) Total counts of T cells and relative proportions of CD8, CD4 and Tregs (FOXP3+) were examined from spleens of WT and HuT mice by flow cytometry. To examine T cell activation, HuT mice were dosed with PBS, 5mg/kg of CD3-binding control, PSMAxCD3 or anti-CD3 OKT3. (**D**) Total CD8 and CD4 T cell counts in the blood were examined 4 hours after dosing by flow cytometry. (**E**) Serum cytokine concentrations were measured 4 hours after dosing by MSD. To demonstrate that PSMA binding is crucial to T cell activation, HuT mice were pre-dosed with PBS, 50mg/kg of isotype control, or anti-PSMA 24 hours before mice were given 5mg/kg PSMAxCD3. (**F**) T cells in blood were examined 4 hours after dosing by flow cytometry. (**G**) Serum cytokine concentrations were measured 4 hours after dosing by MSD.


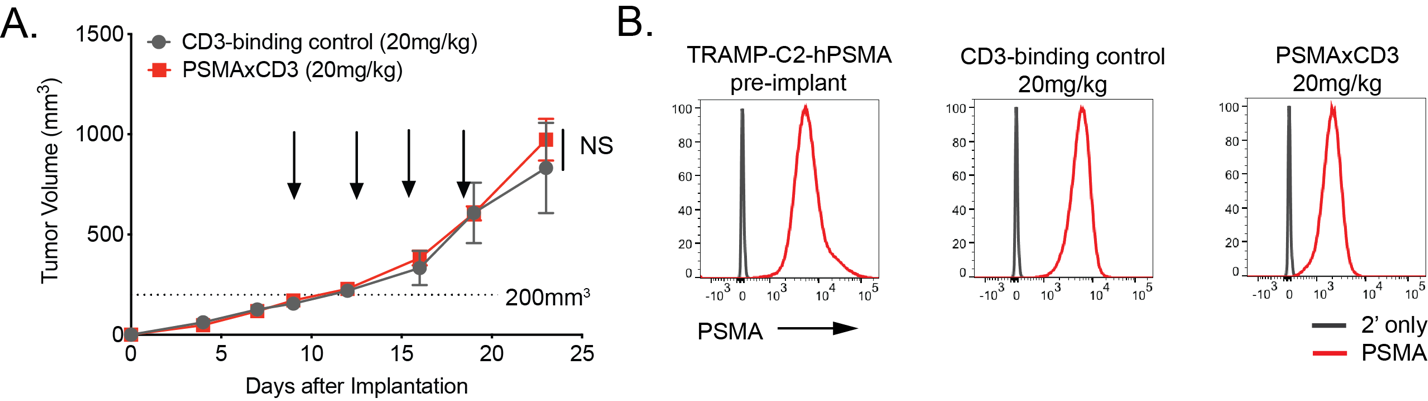


**Fig S3. High dose of PSMAxCD3 does not control large established tumors. (A)** Established 200mm3 TRAMP-C2-hPSMA tumors were treated with 20mg/kg of CD3-binding control or PSMAxCD3 on days 9, 12, 16, and 19 (arrows). Mean tumor volume is shown as SEM (n=5, 2 replicates). Statistical significance by two-way ANOVA compared to CD3-binding control. (**B**) Surface expression of PSMA on TRAMP-C2-hPSMA cells and tumors at the end of study were examined by flow cytometry.


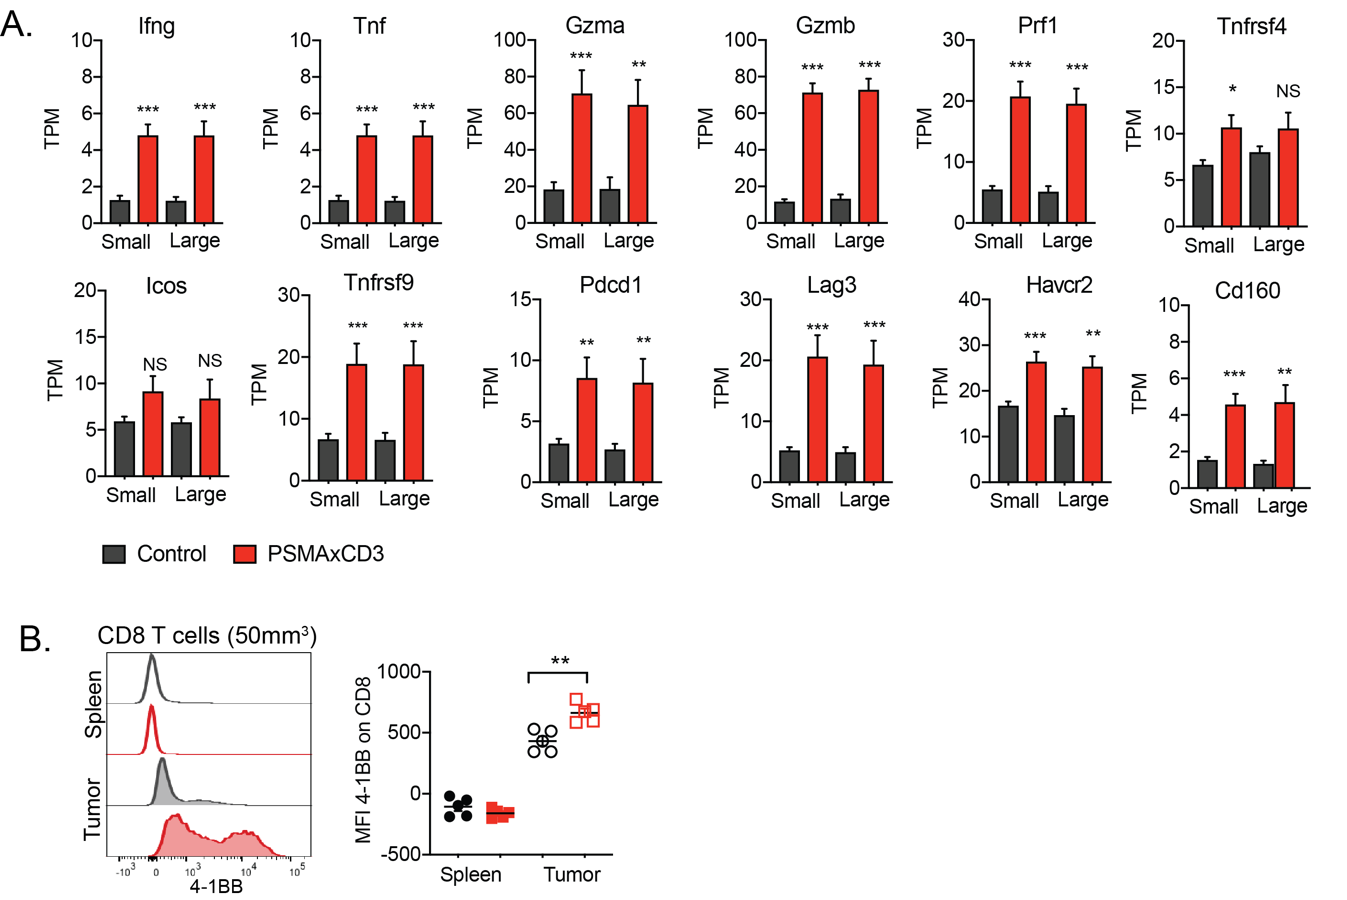


**Fig S4. PSMAxCD3 induces T cell activation in both small and large tumors.** Tumor bearing HuT mice were treated with PBS (control) or 5mg/kg of PSMAxCD3. (**A**) Transcript levels of T cell activation and exhaustion markers were examined in tumors 24 hours treatment administration. Statistical significance is measured by Mann-Whitney test compared to PBS control. ***P<0.001, **P<0.01. (Studies were conducted with n=7-8). (**B**) Representative flow plots and MFI of 4-1BB expression on 50mm3 splenic and tumor CD8 T cells 48 hours after dose. (Studies conducted n=5-15; multiple 50mm3 tumors under 0.1g were combined, 2 replicates).

**
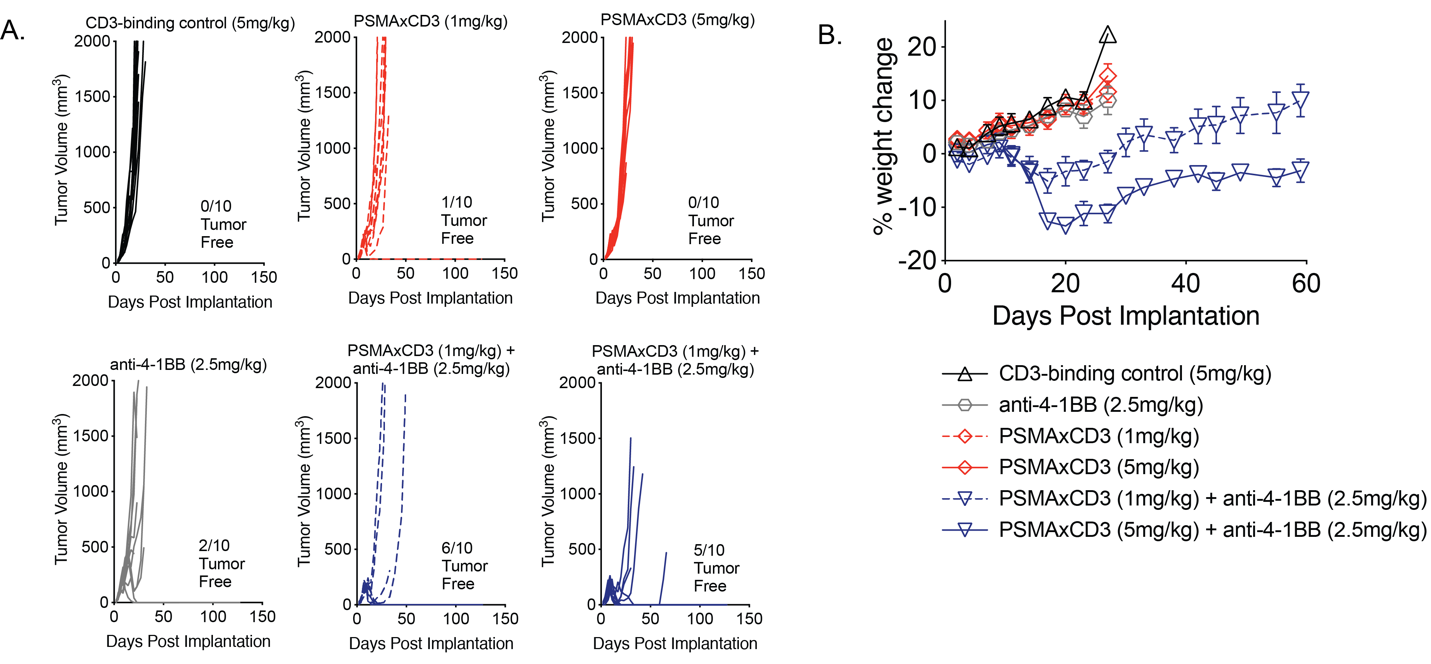
**

**Fig S5. Anti-4-1BB and PSMAxCD3 induces anti-tumor efficacy against large tumors and reversible weight loss at high doses.** Established 200mm3 TRAMP-C2-hPMSA tumors were treated with a single dose (Day 9) of 5mg/kg CD3-binding control, 2.5mg/kg anti-4-1BB, 1mg/kg PSMAxCD3, 5mg/kg PSMAxCD3, 1mg/kg PSMA with 2.5mg/kg of anti-4-1BB, or 5mg/kg PSMAxCD3 with 2.5mg/kg anti-4-1BB. (**A**) Individual tumor growth curve is shown over time. (**B**) % change in weight is shown over the course of the study until the first mouse in the group was sacrificed. (Study conducted with n=10).

**
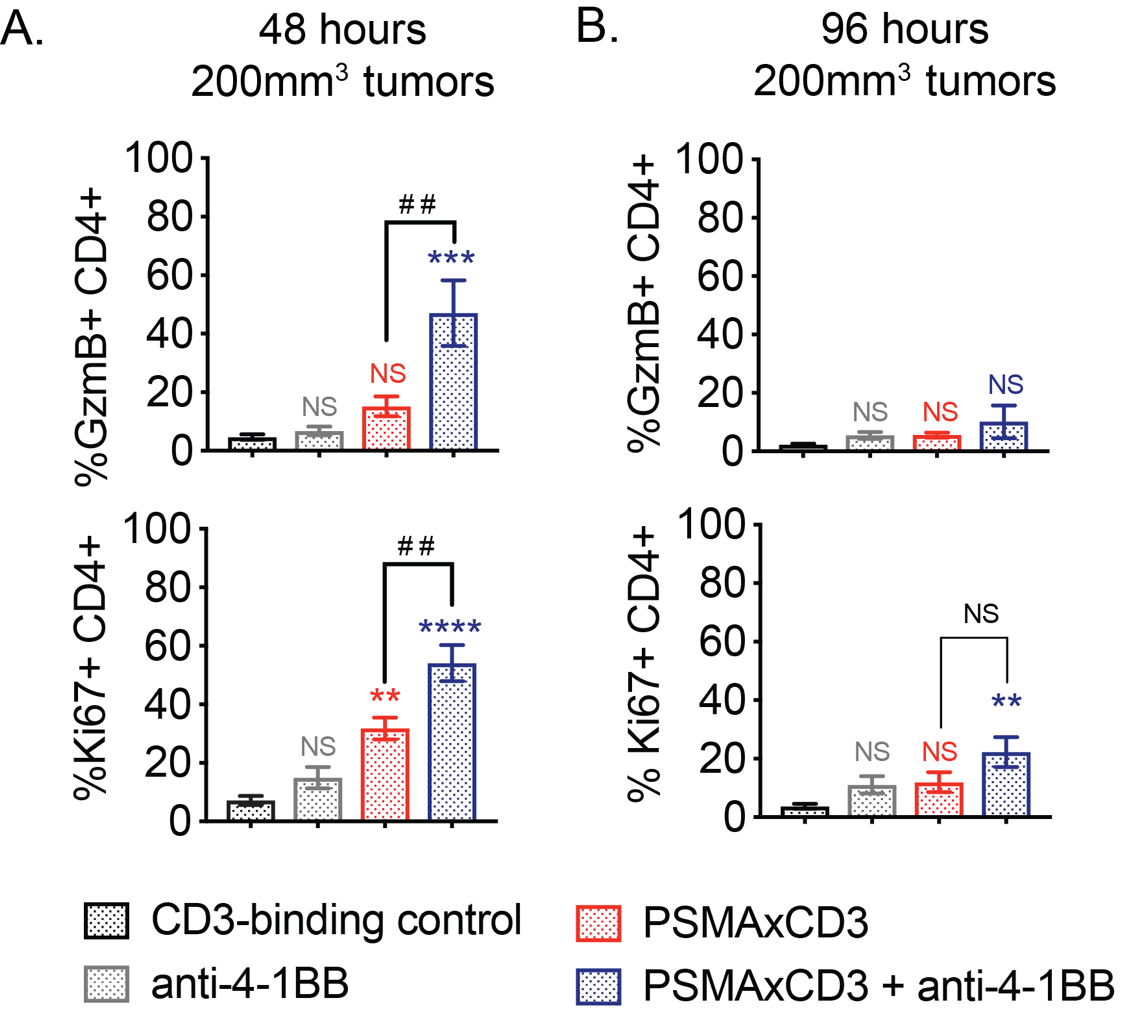
**

**Fig S6. CD4 T cell activation and proliferation in large tumors 48 hours after treatment.**  (**A**) Percentages of Granzyme B+ or Ki67+ CD4 T cells 48 hours after treatment examined by flow cytometry. (**B**) Percentages of Granzyme B+ or Ki67+ CD4 T cells 96 hours after treatment examined by flow cytometry. All statistical significance is measured by one-way ANOVA compared to CD3-binding control (****P<0.0001, ***P<0.001, **P<0.01) or PSMAxCD3 compared to PSMAxCD3 with anti-4-1BB (# #P<0.01).

**
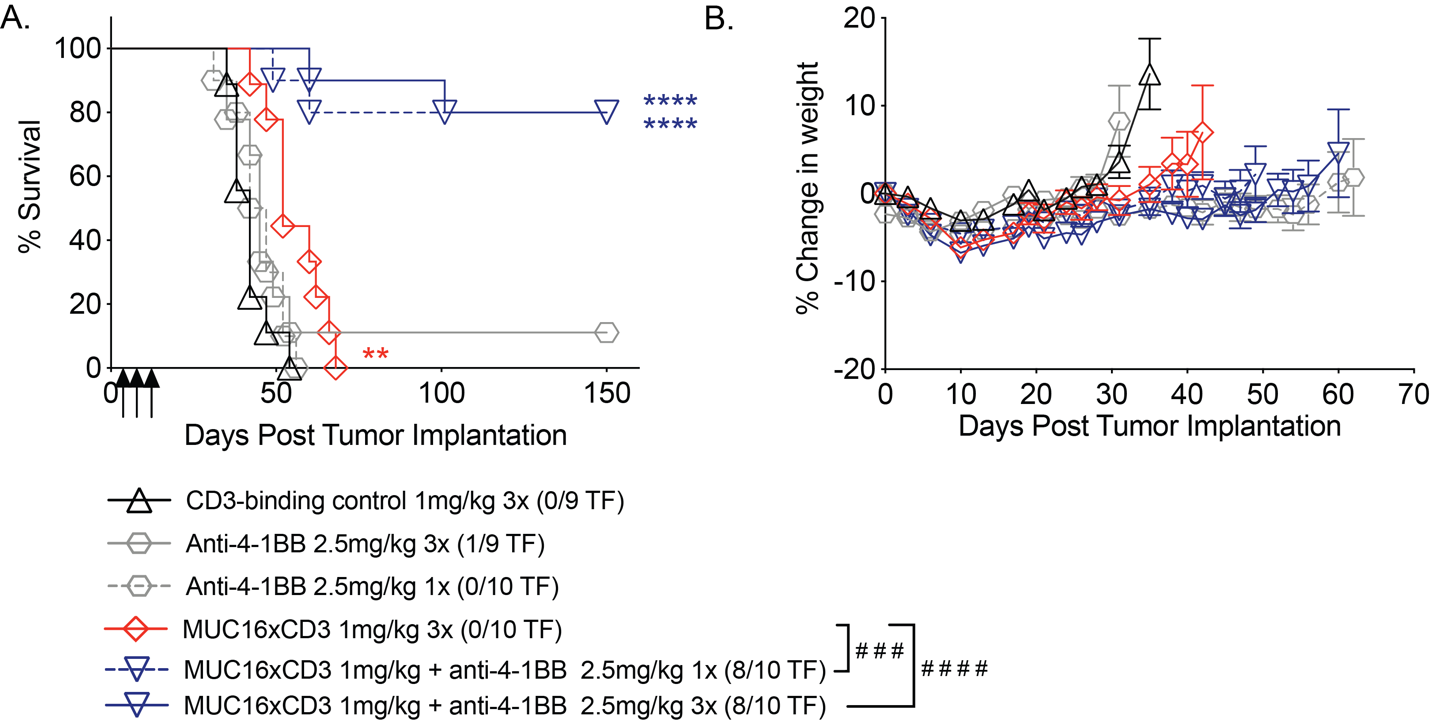
**

**Fig S7. Anti-tumor efficacy of MUC16xCD3 with anti-4-1BB costimulation.** (**A**)HuT (MUC16, CD3) mice implanted with ID8-VEGF/huMUC16 cells (IP) were treated with 1mg/kg CD3-binding control (3x), 2.5mg/kg anti-4-1BB (3x), 2.5mg/kg anti-4-1BB (1x), 1mg/kg MUC16xCD3 (3x), 1mg/kg MUC16xCD3 with 2.5mg/kg anti-4-1BB (1x) or 1mg/kg MUC16xCD3 with 2.5mg/kg anti-4-1BB (3x). Mice were dosed days 3, 6, and 10 (arrows). Survival curves represent euthanasia upon 20% weight gain (n=9-10). Significance is measured by Gehan-Breslow-Wilcoxon test compared to CD3-binding control (****P<0.0001, **P<0.01) and compared to MUC16xCD3 only group (# # # #P<0.0001, # # #P<0.001). (**B**) % change in weight is shown over the course of the study until the first mouse in the group was sacrificed. (Study conducted with n=9-10).
